# Supplementary material for: The Arp2/3 complex has essential roles in vesicle trafficking and transcytosis in the mammalian small intestine
Source: PubMed Central journal article supplement — Mol Biol Cell. 2015 Jun 1;26(11):1995–2004. doi: 10.1091/mbc.E14-10-1481 (PMC4472011; doi:10.1091/mbc.e14-10-1481), 2015-06-01
Supplement: supp_E14-10-1481v1_CombinedSupMats.pdf [file supp_E14-10-1481v1_CombinedSupMats.pdf]

# Supplemental Materials

*Molecular Biology of the Cell*

Zhou et al.

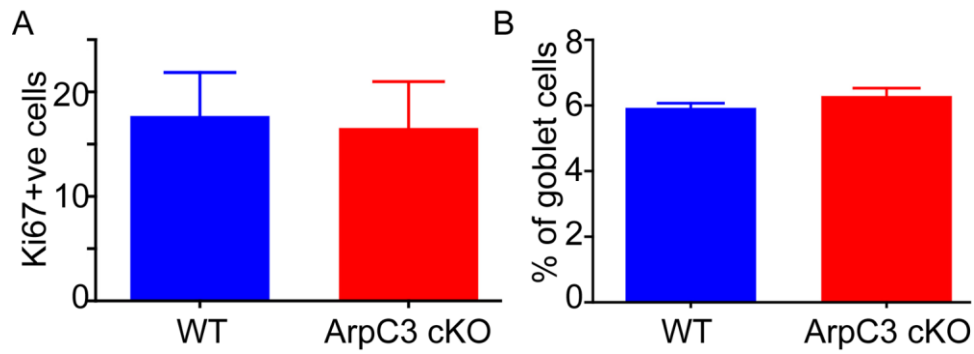

Supplementary Figure 1. Quantitation of proliferation and goblet cell number in WT and ArpC3 cKO intestine. A. Number of Ki67+ve cells per intervillar unit in WT and ArpC3 cKO intestine (n>100 for each of 2 animals for each genotype). No significant difference. B. Percentage of villar epithelial cells that stain positively for goblet cell markers in WT and ArpC3 cKO intestine (n>100 for each of 2 animals for each genotype). No significant difference.

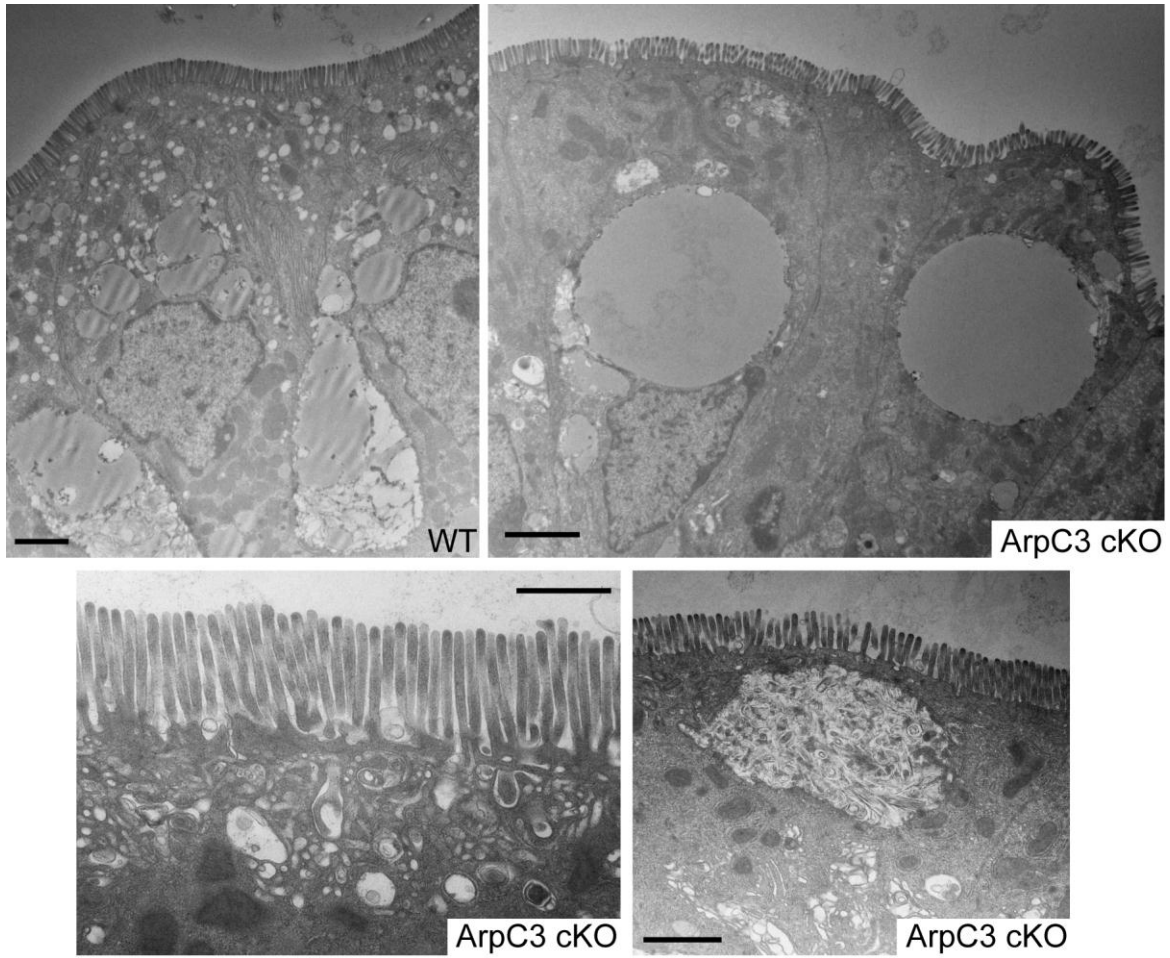

Supplementary Figure 2. Transmission electron microscopy images of WT (A) and ArpC3 cKO intestine (B-D).

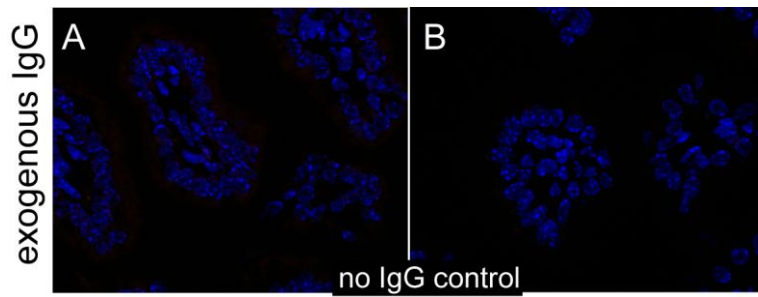

Supplementary Figure 3. Untreated control intestines demonstrating the absence of signal when no exogenous labeled IgGs were added.

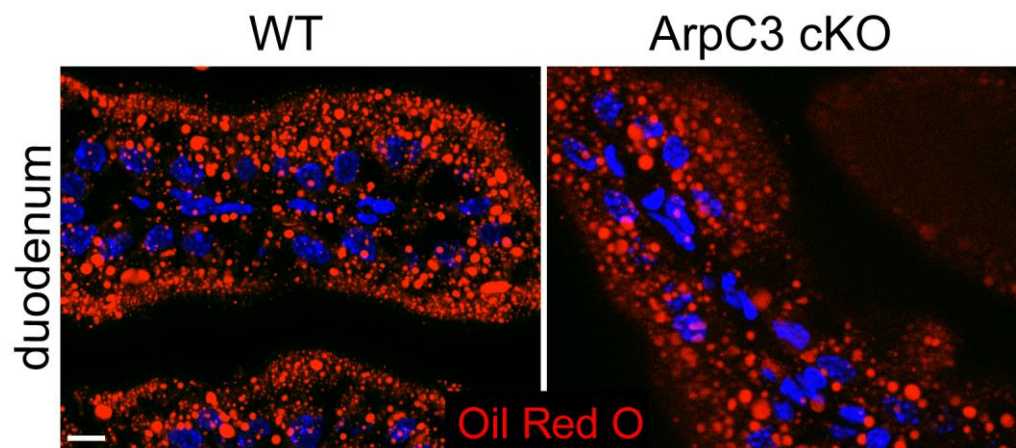

Supplementary Figure 4. Oil Red O staining of the duodenum from WT (A) and ArpC3 cKO (B) mice.

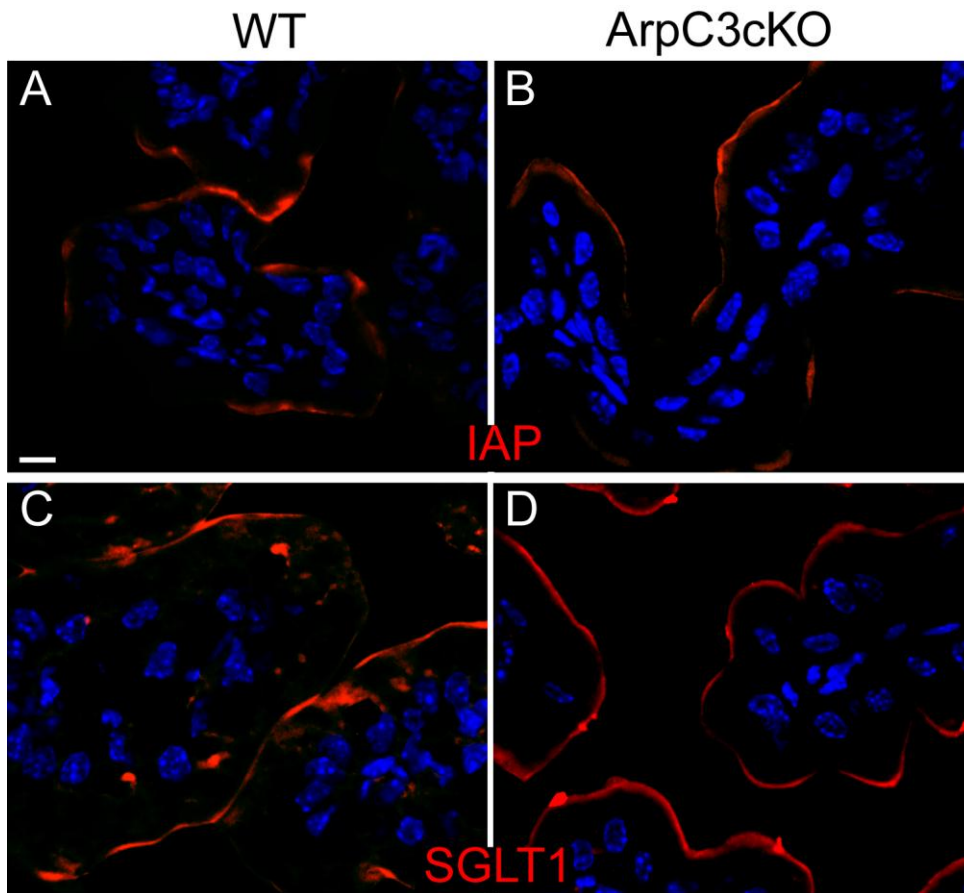

Supplementary Figure 5. Apical protein localization in WT and ArpC3 cKO intestine. Intestinal alkaline phosphatase (IAP) staining in WT (A) and ArpC3 cKO (B) intestine. Sodium-glucose transporter 1 (SGLT1) staining in WT (C) and ArpC3 cKO (D) intestine.
